# Supplementary material for: Cervical Cancer Associated with Pregnancy: Current Challenges and Future Strategies
Source: MDPI journal article supplement (doi:10.3390/cancers16071341), 2024-03-29
Supplement: s1 [file s1]

Supplementary Table S1: case reports of cervical cancer diagnosed during pregnancy. Stage has been updated according to the FIGO 2018 classification

| Author                         | Histology                     | Stage                                                | Trimester   | Treatment                                                                                                                   | Delivery                         | Maternal outcome          | Fetus outcomes                                              |
|--------------------------------|-------------------------------|------------------------------------------------------|-------------|-----------------------------------------------------------------------------------------------------------------------------|----------------------------------|---------------------------|-------------------------------------------------------------|
| <b>Squamous Cell Carcinoma</b> |                               |                                                      |             |                                                                                                                             |                                  |                           |                                                             |
| Aoki et al., 2014              | SCC                           | IB2                                                  | 1T<br>12W   | 17W : RT + PL                                                                                                               | 38W : Csarean                    | Disease-free at 10 months | Healthy infant                                              |
| Bader et al., 2007             | Poorly differentiated SCC     | IIIC1 (pelvic lymph nodes metastases)                | 2T<br>19W   | 23W : NAC (Cisplatin + Vincristine)<br>After delivery : RH + PL<br>After delivery: AC (Cisplatin + Vincristine + Bleomycin) | 33W : Cesarean                   | Disease-free at 80 months | Respiratory distress syndrome at delivery<br>Healthy infant |
| Baloglu et al., 2007           | Poorly differentiated SCC     | IIIA (metastasis at the episiotomy site)             | Post-partum | ARCC                                                                                                                        | Vaginal delivery with episiotomy | Disease-free              | Healthy infant                                              |
| Ben-Arie et al., 2004          | Poorly differentiated SCC     | IA2                                                  | 2T<br>15W   | 17W : Repeat cervical conization + RPL<br>After delivery : RT                                                               | 39W : Cesarean                   | Disease-free              | Healthy infant                                              |
| Bravo et al., 2012             | SCC                           | IB2                                                  | 1T          | RT + PL                                                                                                                     | 26W : Cesarean                   | Disease-free at 40 months | Healthy infant                                              |
| Caluwaerts et al., 2006        | Moderately differentiated SCC | IB1                                                  | 2T<br>15W   | 17W : NAC (Cisplatin)<br>After delivery : RH + PL                                                                           | 32W : Cesarean                   | Disease-free at 6 months  | Healthy infant                                              |
| Can et al., 2013               | SCC                           | 28W : IIB<br>33W : IV (lung and placenta metastasis) | 2T<br>28W   | No treatment, lost to follow-up                                                                                             | 34W : Vaginal delivery           | Died of disease           | Healthy infant                                              |

|                          |                               |                           |           |                                                                                                                 |                          |                                                                 |                                    |
|--------------------------|-------------------------------|---------------------------|-----------|-----------------------------------------------------------------------------------------------------------------|--------------------------|-----------------------------------------------------------------|------------------------------------|
| Dawood et al., 2013      | SCC                           | IIB                       | Early 2T  | NAC (Cisplatin)<br>After delivery :<br>ARCC + BT                                                                | 28W : Cesarean           | Died of disease at 18 months                                    | Healthy infant                     |
| De vincenzo et al., 2018 | Poorly differentiated SCC     | IB2                       | 3T<br>27W | NAC (Cisplatin +<br>Paclitaxel)<br>After delivery : RH +<br>PL<br>ARCC                                          | 35W : Cesarean           | Disease-free                                                    | 22 months : Acute myeloid leukemia |
| Dharan et al., 2009      | SCC                           | IB1                       | 2T<br>14W | 22W : RT + PL                                                                                                   | Termination of pregnancy | Disease-free                                                    | Termination of pregnancy           |
| Enomoto et al., 2011     | SCC                           | IIA                       | 1T        | RT + PL                                                                                                         | 37W : Cesarean           | Disease-free at 6 months                                        | Healthy infant                     |
| Fox et al., 2021         | SCC                           | IIIC1 (pelvic lymph node) | 3T<br>33W | After delivery :<br>PL + RPL + Ovarian transposition<br>ARCC<br>AC (Cisplatin +<br>Paclitaxel +<br>Bevacizumab) | 34W : Cesarean           | NS                                                              | Healthy infant                     |
| Goldman et al., 2003     | Moderately differentiated SCC | IB2                       | 3T<br>35W | After delivery : RH +<br>PL + RPL                                                                               | Vaginal delivery         | Recurrence 5.5 years later at the episiotomy site               | Healthy infant                     |
| Gurney et al., 2009      | Well-differentiated SCC       | IB1                       | 2T<br>21W | After delivery : RAT + SLN                                                                                      | 34W : Cesarean           | Disease-free at 10 months                                       | Healthy infant                     |
| Hoopmann et al., 2003    | SCC                           | IB1                       | 3T<br>38W | After delivery :<br>NAC (Carboplatin +<br>Docetaxel)<br>RH + PL<br>AC (Carboplatin +<br>Docetaxel)              | Vaginal delivery         | Recurrence after chemotherapy completion at the episiotomy scar | NS                                 |
| Jadoul et al., 2011      | SCC                           | IIIC2                     | 3T<br>32W | Previous RAT<br>After delivery :<br>ARCC                                                                        | 33W : Cesarean           | Died of disease                                                 | Healthy infant                     |

|                        |                           |       |                |                                                                                           |                          |                                                                  |                                                                                                         |
|------------------------|---------------------------|-------|----------------|-------------------------------------------------------------------------------------------|--------------------------|------------------------------------------------------------------|---------------------------------------------------------------------------------------------------------|
| Khalil et al., 1993    | SCC                       | IIIB  | After delivery | RT + BT                                                                                   | Vaginal delivery         | Recurrence at the episiotomy site at 3 months<br>Died of disease | NS                                                                                                      |
| Karam et al., 2006     | Poorly differentiated SCC | IIB   | 2T<br>23W      | NAC (Cisplatin)<br>After delivery : RH + PL + RPL + ovarian transposition<br>ARCC         | 33W : Cesarean           | Disease-free at 14 months                                        | Healthy infant                                                                                          |
| Karateke et al., 2010  | SCC                       | IB3   | 2T<br>22W      | 2T : RAT<br>Then : RH                                                                     | -                        | NS                                                               | Deceased during RT procedure                                                                            |
| Kayahashi et al., 2018 | Poorly differentiated SCC | IB3   | 2T<br>16W      | NAC (Cisplatin + Paclitaxel) <i>complete response</i><br>After delivery : RH + PL<br>ARCC | 31W : Cesarean           | Disease-free at 34 months                                        | Respiratory distress syndrome<br>Generalized erythroderma (KID syndrome, non-imputable to chemotherapy) |
| Marana et al., 2001    | SCC                       | IIB   | 2T<br>14W      | NAC (Cisplatin + Bleomycin)<br>Lost of follow-up                                          | 38W : Cesarean           | Died of disease at 1 year                                        | Healthy infant                                                                                          |
| Palaia et al., 2007    | Poorly differentiated SCC | IIB   | 2T<br>19W      | NAC (Cisplatin + Paclitaxel)<br>After delivery : RH + PL                                  | 35W : Cesarean           | Disease-free at 10 months                                        | Healthy infant                                                                                          |
| Saso et al., 2015      | SCC                       | IB1   | 2T<br>17W      | 19W : RT<br>After delivery : PL + RH                                                      | 36W : Cesarean           | Disease-free at 13 months                                        | Healthy infant                                                                                          |
| Saunders et al., 1988  | SCC                       | IV    | 2T<br>18W      | Palliative RT (rib)                                                                       | Termination of pregnancy | Died of disease at 6 weeks                                       | Termination of pregnancy                                                                                |
| Silva et al., 2005     | Poorly differentiated SCC | IIIC1 | 2T<br>14W      | After termination of pregnancy :<br>lymphoscintigraphy<br>RH + PL<br>ARCC + BT            | Termination of pregnancy | Disease-free at 30 months                                        | Termination of pregnancy                                                                                |

| <b>Adenosquamous carcinoma</b> |                                          |                           |           |                                                                                         |                          |                                              |                                        |
|--------------------------------|------------------------------------------|---------------------------|-----------|-----------------------------------------------------------------------------------------|--------------------------|----------------------------------------------|----------------------------------------|
| Hertel et al., 2001            | Adenosquamous carcinoma                  | IIIC1 (pelvic lymph node) | 2T<br>19W | 2T : PL<br>2T : RH + RPL                                                                | Termination of pregnancy | NS                                           | Healthy infant                         |
| Levy et al. 2020               | Adenosquamous                            | IB3                       | 2T<br>18W | NAC (Carboplatin + Paclitaxel)<br>After delivery :<br>ARCC + BT                         | 34W : Cesarean           | NS                                           | Healthy infant                         |
| Peculis et al., 2015           | Poorly differentiated adenosquamous      | IB3                       | 2T<br>17W | 20W : NAC (Cisplatin + Doxorubicin)<br>After delivery : RH + PL + ovarian transposition | 34 : Cesarean            | Disease-free at 20 months                    | Healthy infant                         |
| Schorge et al., 2017           | Adenosquamous carcinoma                  | IB2                       | 1T<br>9W  | After delivery : RH + PL + bilateral oophorectomy<br>Radiotherapy                       | 36W : Cesarean           | Disease-free at 18 months                    | Respiratory distress<br>Healthy infant |
| <b>Adenocarcinoma</b>          |                                          |                           |           |                                                                                         |                          |                                              |                                        |
| Dede et al., 2004              | Villoglandular papillary adenocarcinoma  | IB1                       | 1T<br>8W  | RH                                                                                      | Termination of pregnancy | Died of disease at 5 years                   | Termination of pregnancy               |
| Favero et al., 2010            | Moderately differentiated adenocarcinoma | IB1                       | 1T<br>14W | 17W : PL<br>20W : NAC (Cisplatin)                                                       | 32W : Cesarean           | Disease-free at 12 months                    | Healthy infants (twins)                |
| Guo et al., 2020               | Poorly differentiated adenocarcinoma     | IB3                       | 1T<br>13W | NAC (Carboplatin + Paclitaxel)<br>After delivery : RH + PL                              | 35W : Cesarean           | Disease-free at 4 months                     | Healthy infant                         |
| Heron et al., 2005             | Villoglandular adenocarcinoma            | IB1                       | 3T<br>31W | After delivery : RH + PL + RPL                                                          | Vaginal delivery         | Recurrence on the episiotomy scar at 4 years | Healthy infant                         |
| Hurteau et al., 1995           | Villoglandular adenocarcinoma            | IIB                       | 2T<br>20W | After delivery : RH + PL + RPL                                                          | 32W : Cesarean           | Disease-free at 14 months                    | NS                                     |

|                         |                                                   |     |                            |                                                                              |                                                              |                           |                                                                      |
|-------------------------|---------------------------------------------------|-----|----------------------------|------------------------------------------------------------------------------|--------------------------------------------------------------|---------------------------|----------------------------------------------------------------------|
| Islam et al., 2012      | Moderately differentiated adenocarcinoma          | IB3 | 1T<br>10W                  | 2T : NAC<br>After delivery :<br>RH + PL<br>ARCC                              | 34W : Cesarean                                               | Disease-free at 36 months | Healthy infant                                                       |
| Iwami et al., 2011      | Adenocarcinoma                                    | IB1 | 1T<br>11W                  | 16W : PL + RT                                                                | 34W : emergency cesarean (premature rupture of the membrane) | Disease-free at 14 months | Healthy infant                                                       |
| Kolomainen et al., 2013 | Moderately differentiated adenocarcinoma          | IB3 | 1T<br>2W                   | PL before pregnancy<br>16W : RT                                              | 25W : PROM                                                   | Disease-free at 46 months | Respiratory distress and necrotizing enterocolitis<br>Healthy infant |
| Kyrgiou et al., 2015    | Moderately differentiated adenocarcinoma          | IB1 | 1T<br>8W                   | 9W : LLETZ<br>14W : RAT + PL                                                 | 36W : Cesarean                                               | Disease-free at 7 months  | Temporary respiratory symptoms                                       |
| Lavie et al., 2008      | Well differentiated villoglandular adenocarcinoma | IB1 | 2T<br>13W                  | 14W: conization<br>After delivery : RH + PL                                  | 37W : Cesarean                                               | Disease-free at 18 months | Healthy infant                                                       |
| Lurie et al., 1991      | Papillary serous adenocarcinoma                   | IB1 | Immediately after delivery | After delivery<br>RH + PL + ovarian transposition                            | 39W : spontaneous vaginal delivery                           | NS                        | Healthy infant                                                       |
| Marnitz et al., 2009    | Adenocarcinoma                                    | IB1 | 2T<br>14W                  | 15W : PL<br>NAC (Cisplatin)<br>After delivery : RH                           | 32W : Cesarean                                               | 32W : Cesarean            | Healthy infants (twins)                                              |
| Muallem et al., 2017    | Adenocarcinoma                                    | IB1 | 2T<br>25W                  | 15W : Conization<br>25W : PL<br>After delivery : Total mesometrial resection | 37W : Cesarean                                               | Disease-free at 26 months | Healthy infant                                                       |
| Oliveira et al., 2018   | Poorly differentiated adenocarcinoma              | IIB | 2T<br>20W                  | NAC (Cisplatin + Vincristine)<br>After delivery : RH + PL<br>BT              | 35W : Cesarean                                               | NS                        | NS                                                                   |

[illegible]

|                                 |                                            |     |           |                                                                                                                                                |                          |                                                         |                                                        |
|---------------------------------|--------------------------------------------|-----|-----------|------------------------------------------------------------------------------------------------------------------------------------------------|--------------------------|---------------------------------------------------------|--------------------------------------------------------|
| Ayhan et al., 2011              | CCC                                        | IB1 | 2T<br>18W | NAC : Cisplatin<br>32W : RH                                                                                                                    | 32W : Cesarean           | Disease-free at 36 months                               | Healthy infant (triplet pregnancy)                     |
| Boyd et al., 2009               | CCC                                        | IIB | 2T<br>21W | 25W :<br>NAC (Cisplatin)<br>After delivery :<br>Cisplatin<br>ARCC + BT                                                                         | 35W : Cesarean           | Disease-free at 15 months                               | Oxygen need for 48H and hypoglycemia<br>Healthy infant |
| Terada et al., 2011             | CCC                                        | IIA | 1T<br>10W | 1T : RH + PL +<br>bilateral<br>oophorectomy                                                                                                    | Termination of pregnancy | Disease-free                                            | Termination of pregnancy                               |
| <b>Neuroendocrine Carcinoma</b> |                                            |     |           |                                                                                                                                                |                          |                                                         |                                                        |
| Balderston et al., 1998         | SmCC                                       | IIA | 3T<br>30W | After delivery: NAC (Cisplatin + Etoposide / Vincristine + Dactinomycin + Cyclophosphamide)<br>Radiotherapy + BT<br>AC (Cisplatin + Etoposide) | 30W : emergency cesarean | Disease-free at 5-years                                 | Healthy infants (twins)                                |
| Canto et al., 2014              | SmCC                                       | IV  | 3T<br>36W | No treatment                                                                                                                                   | 36W : Vaginal delivery   | Died of disease at 1 months post-partum                 | Healthy infant                                         |
| Feng et al., 2021               | PNET (poorly differentiated neuroblastoma) | IB1 | 2T<br>15W | 21W : RH                                                                                                                                       | Termination of pregnancy | Disease-free at 3-years                                 | Termination of pregnancy                               |
| Herskovic et al., 2014          | « neuroendocrine »                         | IV  | Early 2T  | NS                                                                                                                                             | NS                       | Died of disease at 3 months                             | Metastatic neuroendocrine tumor<br>Died of disease     |
| Komiyama et al., 2011           | Atypical carcinoid                         | IB3 | Early 2T  | 13W : RH + PL<br>AC (Cisplatin + Paclitaxel + Etoposide)                                                                                       | Termination of pregnancy | Metastasis at 11 months<br>Died of disease at 19 months | Termination of pregnancy                               |
| Leung et al., 1999              | SmCC                                       | IIB | 3T<br>31W | After delivery :<br>NAC (Cisplatin + Etoposide)                                                                                                | 24W : Cesarean           | Disease-free at 14 months                               | Healthy infant                                         |

|                         |                                           |           |                             |                                                                                                              |                             |                              |                                                                                                                                                |
|-------------------------|-------------------------------------------|-----------|-----------------------------|--------------------------------------------------------------------------------------------------------------|-----------------------------|------------------------------|------------------------------------------------------------------------------------------------------------------------------------------------|
|                         |                                           |           |                             | ARCC + BT<br>RH                                                                                              |                             |                              |                                                                                                                                                |
| Li et al., 2009         | Large cell<br>neuroendocrine<br>carcinoma | IIB       | 2T<br>18W                   | ARCC (with Cisplatin<br>+ Etoposide) + BT                                                                    | Termination of<br>pregnancy | Disease-free at 21<br>months | Termination of<br>pregnancy                                                                                                                    |
| Ohwada et al.,<br>2001  | SmCC                                      | IB1       | 3T<br>27W                   | After delivery : RH +<br>PL<br>AC (Cisplatin +<br>Etoposide)                                                 | 29W : Cesarean              | Disease-free at 13<br>months | Healthy infant                                                                                                                                 |
| Perrin et al.,<br>1996  | SmCC                                      | IV        | 3T<br>25W<br>(misdiagnosed) | After delivery :<br>excision of the mass<br>RH + PL + ovarian<br>transposition                               | 36W : Cesarean              | NS                           | Healthy infant                                                                                                                                 |
| Smyth et<br>al.,2010    | SmCC                                      | IB3 bulky | 2T<br>23W                   | 2T : NAC<br>(Adriamycin +<br>Cyclophosphamide)<br>After delivery : NAC<br>(Cisplatin +<br>Etoposide)<br>ARCC | 35W : Cesarean              | NS                           | Mild growth<br>retardation in utero<br>Healthy infant                                                                                          |
| Surbone et al.,<br>2016 | SmCC                                      | IIB       | 2T<br>22W                   | 28W : NAC<br>(Cisplatin +<br>Paclitaxel)<br>After delivery : RPL<br>6 months after : RH                      | 34W : Cesarean              | Disease-free at 6<br>years   | Transient respiratory<br>distress,<br>hypoglycemia,<br>hyperbilirubinaemia<br>At 5 years :<br>retroperitoneal<br>embryonal<br>rhabdomyosarcoma |
| Tsao et al.,<br>2001    | PNET                                      | IB3       | 1T<br>8W                    | NAC<br>(Cyclophosphamide +<br>Adriamycin +<br>Vincristine /<br>Ifosfamide +<br>Etoposide)                    | Termination of<br>pregnancy | NS                           | Termination of<br>pregnancy                                                                                                                    |



|                     |                            |     |           |                                                                                                                                  |                |                           |    |
|---------------------|----------------------------|-----|-----------|----------------------------------------------------------------------------------------------------------------------------------|----------------|---------------------------|----|
|                     |                            |     |           | RH + RPL + ovarian transposition<br>AC<br>(Cyclophosphamide + Adriamycin + Vincristine / Ifosfamide + Etoposide)<br>Radiotherapy |                |                           |    |
| <b>Sarcoma</b>      |                            |     |           |                                                                                                                                  |                |                           |    |
| Meseci et al., 2013 | Embryonal rhabdomyosarcoma | IB3 | 3T<br>30W | After delivery : RH + PL + ovarian transposition<br>AC (Vincristine + Actinomycine D)                                            | 35W : Cesarean | Disease-free at 45 months | NS |

Abbreviations: SCC = Squamous Cell Carcinoma, RAT = Radical Abdominal Trachelectomy, PL = Pelvic Lymphadenectomy, TH = Radical Hysterectomy, T = trimester, W = weeks, NAC = Neo Adjuvant Chemotherapy, AC= Adjuvant Chemotherapy, SmCC = Small Cell Carcinoma, CCC = Clear Cell Carcinoma, RT = Radiotherapy, BT = Brachytherapy, ARCC = , PNET = Primitive neuroectodermal tumor, RT =Radical Trachelectomy, RPL = Retroperitoneal Lymphadenectomy, SLN = Sentinel Lymph Node, LLETZ = Large loop excision of the transformation zone
