# Supplementary material for: Cervical Cancer Associated with Pregnancy: Current Challenges and Future Strategies
Source: MDPI journal article supplement (doi:10.3390/cancers16071341), 2024-03-29
Supplement: s1 [file s1]

Supplementary Table S2 : series of cervical cancer diagnosed during pregnancy. Stage has been updated according to the FIGO 2018 classification

| Author               | Number of patients                             | Histology          | Stage                                 | Trimester                                          | Treatment                                                                                                  | Delivery                                                                                       | Maternal outcome                                                          | Fetus outcomes                                                                                              |
|----------------------|------------------------------------------------|--------------------|---------------------------------------|----------------------------------------------------|------------------------------------------------------------------------------------------------------------|------------------------------------------------------------------------------------------------|---------------------------------------------------------------------------|-------------------------------------------------------------------------------------------------------------|
| Alouini et al., 2008 | 8                                              | SCC (5)<br>ADK (3) | IB1 – IIIC1                           | 1T – 3T<br>12W – 32W                               | RPL + PL first, as staging modality<br>Curative treatment depending on the stage of the disease afterwards | Cesarean                                                                                       | Died of disease for IIIC patients<br>Disease-free for stade I-II patients | 1 miscarriage<br>7 healthy infants                                                                          |
| Baltzer et al., 1990 | 40                                             | NS                 | IB                                    | 12W (10)<br>22W (10)<br>36W (4)<br>Postpartum (16) | RH + PL<br>Radiotherapy if necessary                                                                       | Cesarean                                                                                       | Better prognosis for patients diagnosed during pregnancy than post-partum | NS                                                                                                          |
| Benhaim et al., 2007 | 2                                              | SCC (2)            | IIB<br>IVA                            | 1T                                                 | ARCC with fetus in utero<br>Uterine curettage<br>BT<br>+/- surgery                                         | Termination of pregnancy                                                                       | Died of disease at 20 months – disease-free at 29 months                  | Termination of pregnancy                                                                                    |
| Bigelow et al., 2016 | Case-control<br>28 pregnant<br>52 non-pregnant | SCC / ADK          | IB1 (56%)<br>II (14%)<br>III-IV (11%) | Average : 2T / 17W                                 | RH after delivery or few weeks after                                                                       | Termination of pregnancy / miscarriage (1T) (7)<br>Mean delivery : 36W<br>Vaginal delivery (4) | No difference in survival between groups                                  | 25% termination of pregnancy<br>No significant fetal growth restriction for other babies<br>Healthy infants |

|                        |    |                                                 |                                                                   |                                                |                                                                                                                                                 |                                                                                  |                                                                                             |                                           |
|------------------------|----|-------------------------------------------------|-------------------------------------------------------------------|------------------------------------------------|-------------------------------------------------------------------------------------------------------------------------------------------------|----------------------------------------------------------------------------------|---------------------------------------------------------------------------------------------|-------------------------------------------|
| Carillon et al., 2011  | 5  | SCC (3)<br>ADK (1)<br>SmCC (1)                  | IB1 (80%)                                                         | 1T (1)<br>2T (3)<br>3T (1)                     | NAC (3)<br>ARCC (4)<br>Palliative chemotherapy (1)                                                                                              | Median cesarean at 32W                                                           | 1 died of disease at 12 months (neuroendocrine carcinoma)                                   | 2 respiratory distress<br>Healthy infants |
| El Mazghi et al., 2014 | 5  | Poorly differentiated<br>SCC (5)                | IB1 (3)<br>IB3 (2)                                                | 1T (1)<br>2T (1)<br>3T (3)                     | ARCC (2)<br>RH + PL +<br>Radiotherapy (3)                                                                                                       | Termination of pregnancy (2)<br>34-37W :<br>Cesarean (3)                         | Disease-free at median 36 months                                                            | NS                                        |
| Favero et al., 2010    | 18 | SCC (9)<br>ADK (9)                              | IA1 (2)<br>1A2 (1)<br>1B1 (13)<br>1B2 (1)<br>2A (1)               | 1T (4)<br>2T (14)                              | PL first, as staging modality                                                                                                                   | Cesarean (14)                                                                    | Disease-free at median 38 months                                                            | Healthy infants (14)                      |
| Ferrioli et al., 2012  | 5  | SCC (3)<br>ADK (2)                              | IA2 (1)<br>IB1 (3)<br>IIIC2 (1)                                   | 1T (3)<br>2T (2)                               | RT + PL (5)<br>Adjuvant RH +<br>ARCC (1)                                                                                                        | Termination of pregnancy (1)<br>Spontaneous abortion (2)<br>Cesarean (3)         | Died of disease at 3 years (1)<br>Disease-free at median 191 months (4)                     | Healthy infants (3)                       |
| Fruscio et al., 2012   | 9  | SCC (7)<br>ADK (2)<br>Poorly differentiated (7) | IB2 (4)<br>IB3 (5)                                                | 1T (1)<br>2T (8)                               | NAC after 16 weeks of gestation (Cisplatin / cisplatin + Navelbine) (9)<br>After delivery : RH (9)<br>Adjuvant RT (1)<br>Adjuvant ARCC + BT (1) | 30-36W :<br>Cesarean (9)                                                         | Died of disease at 27 months (2)<br>Local relapse (2)<br>Disease-free after pregnancy (5/9) | Healthy infants (9)                       |
| Germann et al., 2005   | 21 | SCC (20)<br>ADK (1)                             | IB1 (14)<br>IB2 (1)<br>IIB (5)<br>IVA (1)<br><br>After lymph node | 1T (13)<br>2T (5)<br>3T (2)<br>Post-partum (1) | RH + PL + BT (10)<br>RH + PL + RT + BT (5)<br>RH + PL + RT + BT + AC (3)<br>Radiotherapy + RH + PL + BT (1)                                     | Termination of pregnancy (9)<br>Spontaneous abortion (1)<br>Vaginal delivery (3) | Disease-free (14)<br>Died of disease (4)<br>Lost of follow-up (2)                           | Healthy infants (10)                      |

|                          |    |                                                           |                                                                             |                              |                                                                                                                                                                                        |                                                 |                                                |                                                                               |
|--------------------------|----|-----------------------------------------------------------|-----------------------------------------------------------------------------|------------------------------|----------------------------------------------------------------------------------------------------------------------------------------------------------------------------------------|-------------------------------------------------|------------------------------------------------|-------------------------------------------------------------------------------|
|                          |    |                                                           | evaluation :<br>IIIC1 (7)<br>IIIC2 (2)                                      |                              | Radiotherapy + RH +<br>PL + RT + BR + AC<br>(1)<br>arc + BT (1)                                                                                                                        |                                                 |                                                |                                                                               |
| Huang et al.,<br>2021    | 4  | SCC (4)<br>ADK (1)                                        | IB2 (3)<br>IB3 (1)<br><br>After<br>lymph node<br>evaluation<br>IIIC1 (2)    | 2T (1)<br>3T (1)             | NAC (Cisplatin +<br>Paclitaxel) (4)<br>After delivery : RH +<br>PL (4)<br>Radiotherapy (4)                                                                                             | Cesarean (4)                                    | Disease-free at<br>10-56 months<br>(4)         | Healthy infant<br>(4)                                                         |
| Ishioka et<br>al., 2009  | 7  | SCC (6)<br>ADK (1)                                        | IB1 (2)<br>IB2 (3)<br>IB3 (1)<br>NS (1)                                     | 1T (3)<br>2T (2)<br>3T (2)   | RH + PL with fetus in<br>situ (2)<br>NAC (1)<br>RH + PL after<br>delivery (5)<br>AC (3)                                                                                                | Termination of<br>pregnancy (2)<br>Cesarean (5) | NS                                             | Healthy<br>infants (5)                                                        |
| Lanowska et<br>al., 2011 | 8  | SCC (5)<br>ADK (3)                                        | IB1 (7)<br>IVB (1)                                                          | 2T (8)                       | PL (8)<br>NAC (Cisplatin) (8)<br>After delivery : RH<br>(8)                                                                                                                            | Cesarean (8)                                    | Disease-free (8)                               | Transient<br>respiratory<br>distress (7)<br>Healthy<br>infants (9)<br>(twins) |
| Lee et al.,<br>2008      | 40 | SCC (30)<br>ADK (6)<br>Adenosquamous<br>(1)<br>Others (3) | IA1 (6)<br>IB1 (16)<br>IB2 (9)<br>IIA (4)<br>IIB (3)<br>IIIB (1)<br>IVA (1) | 1T (18)<br>2T (14)<br>3T (7) | RH + PL with fetus in<br>situ (17)<br>RH + PL after<br>delivery (7)<br>ARCC with fetus in<br>situ (2)<br>RAT after delivery (1)<br>Conization after<br>termination of<br>pregnancy (1) | NS                                              | Died of disease<br>(2)<br>Disease-free<br>(38) | Healthy<br>infants (23)                                                       |

|                       |    |                                             |                                                       |                  |                                                                                                       |                                              |                                                                  |                               |
|-----------------------|----|---------------------------------------------|-------------------------------------------------------|------------------|-------------------------------------------------------------------------------------------------------|----------------------------------------------|------------------------------------------------------------------|-------------------------------|
|                       |    |                                             |                                                       |                  | Delay of treatment (12)                                                                               |                                              |                                                                  |                               |
| Li et al., 2011       | 2  | SCC (2)                                     | IB3 (2)                                               | 3T (2)           | NAC (Cisplatin + Paclitaxel) (2)<br>After delivery : RH + PL (2)<br>ARCC (2)                          | Cesarean (2)                                 | Disease-free at 13-21 months (2)                                 | Healthy infant (2)            |
| Martnitz et al., 2010 | 7  | SCC                                         | IB (6)<br>IIIC (1)                                    | 2T (7)           | NAC (Cisplatin)<br>After delivery : RH + PL                                                           | Cesarean (7)                                 | Disease-free at median follow-up of 7 months (7)                 | Healthy infants (8) (2 twins) |
| Papadia et al., 2015  | 2  | Adenocarcinoma (1)<br>Adenosquamous (1)     | IB2 (1)<br>IB1 (1)                                    | 2T (2)           | SLN + PL (2)<br>Conization (1)<br>RAT+ AC (Carboplatin) + Radiotherapy (1)                            | Cesarean                                     | Disease-free at 24 months (1)                                    | Healthy infants (2)           |
| Puchar et al., 2020   | 20 | SCC (11)<br>ADK (8)<br>Undifferentiated (1) | IA (2)<br>IB (12)<br>II (2)<br>III (1)<br>Missing (3) | Median 23W (2T)  | NAC (5)<br>RH (9)<br>Conization (5)<br>RAT (2)<br>No surgery (2)<br>Missing (2)<br>ARCC (8)<br>BT (2) | Termination of pregnancy (2)                 | NS                                                               | Healthy infants (18)          |
| Ribeiro et al., 2012  | 3  | SCC (2)<br>ADK (1)                          | IB2 (3)                                               | 2T (3)           | RH + PLwith fetus in situ (1)<br>RH + PL after delivery (2)                                           | Termination of pregnancy (1)<br>Cesarean (2) | Disease-free at 6 months - 5 years (2)<br>Vaginal recurrence (1) | Healthy infant (2)            |
| Ricci et al., 2016    | 4  | SCC (4)                                     | IB2 (2)<br>IIA (1)<br>IIB (1)                         | 1T (1)<br>2T (3) | NAC (Cisplatin / Carboplatin + Paclitaxel) (4)<br>After delivery : RH + PL (4)<br>ARCC (2) + BT (1)   | Cesarean (4)                                 | Died of disease at 2 years (1)<br>Disease-free (3)               | Healthy infants (4)           |

|                                           |    |                                          |                                                                            |                                                        |                                                                                                                                                                    |                                                            |                                                           |                                                 |
|-------------------------------------------|----|------------------------------------------|----------------------------------------------------------------------------|--------------------------------------------------------|--------------------------------------------------------------------------------------------------------------------------------------------------------------------|------------------------------------------------------------|-----------------------------------------------------------|-------------------------------------------------|
|                                           |    |                                          |                                                                            |                                                        | RT (1)                                                                                                                                                             |                                                            |                                                           |                                                 |
| Rodolakis et al., 2018 (serie and review) | 26 | ADK (7)<br>Adenosquamous (1)<br>SCC (18) | IA2 (2)<br>IB1 (22)<br>IB2 (2)                                             | 1T (8)<br>2T (18)                                      | RVT + PL                                                                                                                                                           | Miscarriage (5: 4 during 1T, 1 during 2T)<br>Cesarean (21) | Died of disease (2)<br>Disease-free (24)                  | Death of the infant (1)<br>Healthy infants (20) |
| Salvo et al., 2018                        | 5  | ADK(3)<br>SCC (2)                        | IB2 (5)                                                                    | 1T (1)<br>2T (4)                                       | Simple trachelectomy + PL (5)<br>AC (1)                                                                                                                            | Cesarean (5)                                               | Disease-free at 18-168 months                             | Healthy infants                                 |
| Takushi et al., 2002                      | 28 | SCC (27)<br>ADK (1)                      | IA1 (9)<br>IA2 (3)<br>IB1 (6)<br>IB2 (4)<br>IIA (1)<br>IIB (3)<br>IIIB (2) | <22W (20)<br>22-36W (4)<br>>36W (1)<br>Post-partum (3) | RH after termination of pregnancy (3)<br>RH with fetus in situ (8)<br>After delivery : RH (1)<br>After delivery : RT (1)<br>Delay of treatment after delivery (12) | NS                                                         | Disease-free (15)                                         | Healthy infants (NNS)                           |
| Umemoto et al., 2019                      | 5  | ADK (3)<br>SCC (2)                       | IB1 (4)<br>IB2 (1)                                                         | 2T (4)<br>3T (1)                                       | RVT + PL (5)<br>After delivery : RH + AC (Carboplatin + Paclitaxel) (1)                                                                                            | Cesarean (5)                                               | Local recurrence during pregnancy (1)<br>Disease-free (4) | NS                                              |
| Ungar et al., 2006                        | 5  | SCC (5)                                  | IB1 (5)                                                                    | 1T (4)<br>2T (1)                                       | RAT + PL                                                                                                                                                           | Cesarean (2)<br>Miscarriage (3)                            | Disease-free at a median 40 months (5)                    | NS                                              |
| Van Vliet et al., 1998                    | 12 | SCC (8)<br>ADK (4)                       | IB (7)<br>IIA (1)<br>IIB (1)<br>IIIC (3)                                   | NS                                                     | Delay of treatment median 3.5 weeks (6)<br>RH with fetus in situ (3)<br>RH with fetus in situ + Radiotherapy (3)                                                   | Vaginal delivery (1)<br>Cesarean (5)                       | Died of disease (2)<br>Disease-free (10)                  | Healthy infants (6)                             |

|                         |    |                                           |                                                                                          |                                               |                                                                                   |                                                                       |                                                                   |                                             |
|-------------------------|----|-------------------------------------------|------------------------------------------------------------------------------------------|-----------------------------------------------|-----------------------------------------------------------------------------------|-----------------------------------------------------------------------|-------------------------------------------------------------------|---------------------------------------------|
|                         |    |                                           |                                                                                          |                                               | After delivery :<br>RH (4)<br>Radiotherapy (2)                                    |                                                                       |                                                                   |                                             |
| Vercellino et al., 2013 | 32 | SCC (17)<br>ADK (15)                      | IA1 (3)<br>IA2 (7)<br>IB1 (17)<br>IB2 (4)<br>IIA (1)<br><br>After staging :<br>IIIC1 (4) | 1T (4)<br>2T (28)                             | PL first, as staging modality<br>NAC (14)<br>After delivery : RH (28)<br>ARCC (4) | Cesarean (27)<br>Termination of pregnancy (5)                         | Disease-free (23/23)                                              | Healthy infants (29) (twins)                |
| Xia et al., 2014        | 20 | SCC (18)<br>Adenosquamous (1)<br>SmCC(1)  | IS – IIA (16)<br>IIB-IIIB (4)                                                            | 1T (8)<br>2T (4)<br>3T (2)<br>Post-partum (6) | Surgery (15)<br>Radiotherapy/ ARCC (4)<br>Palliative chemotherapy (1)             | Vaginal delivery (3)                                                  | Disease-free (14)<br>Died of disease (5)<br>Lost of follow-up (1) | NS                                          |
| Yoshihara et al., 2018  | 6  | SCC (6)                                   | IB1 (6)                                                                                  | Median 15W                                    | RT + PL(6)<br>After delivery : AC (Carboplatin + Paclitaxel) (4)                  | Cesarean (6)                                                          | Disease-free at 3-41months (6)                                    | Healthy infant (6)                          |
| Zhang et al., 2015      | 20 | SCC (18)<br>Adenosquamous (1)<br>SmCC (1) | IS (1)<br>IA1 (1)<br>IB1 (5)<br>IB2 (1)<br>IIA (8)<br>IIB (3)<br>IIIB (1)                | 1T (8)<br>2T (4)<br>3T (2)<br>Post-partum (6) | NAC (3)<br>Surgery (15)<br>RT/ARCC (5)                                            | Vaginal delivery (3)<br>Cesarean (4)<br>Termination of pregnancy (13) | Died of disease (5)<br>Disease-free (15)                          | Retard of growth (1)<br>Healthy infants (6) |

Abbreviations: SCC = Squamous Cell Carcinoma, RAT = Radical Abdominal Trachelectomy, PL = Pelvic Lymphadenectomy, TH = Radical Hysterectomy, T = trimester, W = weeks, NAC = Neo Adjuvant Chemotherapy, AC= Adjuvant Chemotherapy, SmCC = Small Cell Carcinoma, CCC = Clear Cell Carcinoma,

RT = Radiotherapy, BT = Brachytherapy, ARCC = , PNET = Primitive neuroectodermal tumor, RT =Radical Trachelectomy, RPL = Retroperitoneal Lymphadenectomy, SLN = Sentinel Lymph Node, LLETZ = Large loop excision of the transformation zone, RVT= Radical Vaginal Trachelectomy
